# Supplementary material
Source: PubMed Central journal article supplement (PMC137754)
Supplement: pnas_222377899_1.pdf [file pnas_222377899_1.pdf]

**Table 1. Benzo[a]pyrene-induced 6-TG<sup>R</sup> in wild-type, *Xpa*<sup>-/-</sup>, *Polk*<sup>+/+</sup>, and *Polk*<sup>-/-</sup> ES cells**

| Cell type                           | B[a]P, $\mu\text{M}$ | Total cells, $10^6$ | 6-TG <sup>R</sup> colonies | MF,* $10^{-6}$ | Average, <sup>†</sup> $10^{-6}$ |
|-------------------------------------|----------------------|---------------------|----------------------------|----------------|---------------------------------|
| Wild type (TT2)                     | 0                    | 2.00                | 0                          | < 0.499        | ND                              |
|                                     | 0.5                  | 2.60                | 0                          | < 0.385        | ND                              |
|                                     | 5                    | 1.06                | 3                          | 2.83           | 6.7 $\pm$ 6.3                   |
|                                     | 10                   | 6.41                | 83                         | 13.0           | 15.0 $\pm$ 0.8                  |
| <i>Polk</i> <sup>+/-</sup> (no. 48) | 0                    | 1.56                | 0                          | < 0.641        | ND                              |
|                                     | 0.5                  | 1.57                | 0                          | < 0.638        | ND                              |
|                                     | 5                    | 1.17                | 2                          | 1.71           | 1.5 $\pm$ 2.1                   |
|                                     | 10                   | 1.10                | 11                         | 10.0           | 12.7 $\pm$ 4.7                  |
| <i>Polk</i> <sup>-/-</sup> (A71)    | 0                    | 2.23                | 0                          | < 0.449        | ND                              |
|                                     | 0.5                  | 1.24                | 4                          | 3.24           | 6.2 $\pm$ 4.9                   |
|                                     | 5                    | 1.99                | 9                          | 4.52           | 7.7 $\pm$ 3.9                   |
|                                     | 10                   | 0.94                | 160                        | 170            | 232 $\pm$ 123                   |
| <i>Polk</i> <sup>-/-</sup> (A72)    | 0                    | 1.31                | 0                          | < 0.765        | ND                              |
|                                     | 0.5                  | 1.16                | 3                          | 2.60           | 2.9 $\pm$ 1.0                   |
|                                     | 5                    | 1.19                | 12                         | 10.1           | 10.8 $\pm$ 2.3                  |
|                                     | 10                   | 0.68                | 65                         | 95.6           | 123 $\pm$ 69                    |
| Wild type (F1/1)                    | 0                    | 1.86                | 1                          | 0.538          | 0.33 $\pm$ 0.47                 |
|                                     | 0.5                  | 1.73                | 0                          | < 0.577        | ND                              |
|                                     | 5                    | 1.20                | 1                          | 0.831          | 1.8 $\pm$ 2.5                   |
|                                     | 10                   | 1.09                | 13                         | 11.9           | 14.7 $\pm$ 5.8                  |
| <i>Xpa</i> <sup>-/-</sup> (176-20)  | 0                    | 1.16                | 7                          | 6.06           | 6.9 $\pm$ 2.5                   |
|                                     | 0.5                  | 0.71                | 95                         | 133            | 132 $\pm$ 42                    |
|                                     | 5                    | 0.82                | 141                        | 172            | 182 $\pm$ 109                   |
|                                     | 10                   | 0.57                | 120                        | 209            | 211 $\pm$ 74                    |

ND, not determined.

\*MF, mutant frequency; the number of 6-TG<sup>R</sup> colonies was divided by the number of cells plated (sum of three experiments).

†Average mutant frequency; the average and standard error was calculated from three independent experiments.
