# Supplementary material
Source: PubMed Central journal article supplement (PMC137754)
Supplement: pnas_222377899_2.pdf [file pnas_222377899_2.pdf]

**Table 2. Mutation spectrum at the *Hprt* locus in wild-type and *Polk*<sup>-/-</sup> ES cells**

| Mutant no.*                      | Position <sup>†</sup> | Mutation <sup>‡</sup> | Sequence <sup>§</sup> | Purine strand | Amino acid change                  |
|----------------------------------|-----------------------|-----------------------|-----------------------|---------------|------------------------------------|
| <i>Polk</i> <sup>+/+</sup> (TT2) |                       |                       |                       |               |                                    |
| 25-56                            | 134                   | G→A                   | cagGtta               | NT            | G16D                               |
| 25-2                             | 152                   | A→G                   | caaAaca               | T             | F22S                               |
| 20-10                            | 175                   | <b>G→T</b>            | gccGagg               | NT            | E30STOP                            |
| 19-1                             | 204                   | A→T                   | tccAtga               | T             | H39Q                               |
| *19-6                            | 206                   | G→A                   | atgGact               | NT            | G40E                               |
| 25-55                            | 208                   | G→C                   | tcaGtcc               | T             | L41V                               |
| *12-14                           | 217                   | G→C                   | atgGaca               | NT            | D44H                               |
| 25-26                            | 217                   | <b>G→T</b>            | atgGaca               | NT            | D44Y                               |
| 25-54                            | 218                   | A→G                   | tggAcag               | NT            | D44G                               |
| 25-15                            | 284                   | G→A                   | tctGtgt               | NT            | C66Y                               |
| 25-52                            | 295                   | G→A                   | aagGggg               | NT            | G70R                               |
| 14-2                             | 318                   | <b>G→T</b>            | cagGtca               | T             | D77E                               |
| *14-9                            | 319                   | G→A                   | gcaGgtc               | T             | No change                          |
| 14-6                             | 319                   | G→C                   | gcaGgtc               | T             | L78V                               |
| 25-19                            | 320                   | A→G                   | cgaAggt               | T             | L78P                               |
| 20-1                             | 328                   | A→G                   | tgtAatc               | T             | Y81H                               |
| *14-9                            | 457                   | A→G                   | tcaActt               | NT            | T124A                              |
| 14-1                             | 479                   | A→G                   | atcAaga               | T             | L131S                              |
| 25-16                            | 499                   | <b>G→T</b>            | attGaca               | NT            | D138Y                              |
| 25-10                            | 551                   | G→C                   | ttgGggc               | T             | P155R                              |
| 25-51                            | 573                   | G→C                   | caaGctt               | T             | S162R                              |
| 25-8                             | 583                   | A→G                   | gtgAaaa               | NT            | K166E                              |
| 15-1                             | 608                   | A→C                   | gatAcag               | NT            | Y174S                              |
| 15-6                             | 635                   | A→G                   | ggaAttt               | T             | I183T                              |
| 25-18                            | 649                   | <b>G→T</b>            | tttGttg               | NT            | V188F                              |
| 25-17                            | 656                   | <b>G→T</b>            | tTgGata               | NT            | G190V                              |
| 6-4                              | 688                   | <b>G→T</b>            | aggGatt               | NT            | D201Y                              |
| 15-9                             | 713                   | <b>G→T</b>            | ttaGtga               | NT            | S209I                              |
| 25-52                            | 713                   | <b>G→T</b>            | ttaGtga               | NT            | S209I                              |
| *19-6                            | 717                   | A→G                   | tgaAact               | NT            | No change                          |
| 25-13                            | 722                   | G→A                   | ctgGaaa               | NT            | G212E                              |
| 7-2                              | 274                   | -1G                   | attGtgg               | NT            | Frameshift                         |
| 15-2                             | 586-587               | G2 > G1               | aaaGGacc              | NT            | Frameshift                         |
| 25-9                             | 667                   | -1G                   | cttGact               | NT            | Frameshift                         |
| 25-7                             | ?                     | v                     |                       |               | Deletion of 91 bp at 3' of exon 1  |
| 16-2                             | ?                     |                       |                       |               | Complete deletion of exons 2 and 3 |
| 20-7                             | ?                     |                       |                       |               | Complete deletion of exon 3        |
| 25-1                             | ?                     |                       |                       |               | Deletion of 111 bp at 3' of exon 3 |
| 25-5                             |                       |                       |                       |               | Complete deletion of exons 7 and 8 |
| *12-14                           | ?                     |                       |                       |               | SINE insertion in exon 2           |
| <i>Polk</i> <sup>-/-</sup> (A71) |                       |                       |                       |               |                                    |
| 30-4                             | 127                   | <b>G→T</b>            | gatGaac               | NT            | E14STOP                            |
| 30-1                             | 175                   | <b>G→T</b>            | gccGagg               | NT            | E30STOP                            |
| 23-4                             | 183                   | <b>G→T</b>            | tttGgaa               | NT            | L32F                               |
| 30-6                             | 190                   | G→A                   | aaaGtgt               | NT            | V35M                               |

|        |         |            |                 |    |                                    |
|--------|---------|------------|-----------------|----|------------------------------------|
| 30-38  | 200     | <b>G→T</b> | tgaGgaa         | T  | P38H                               |
| 23-14  | 200     | G→A        | tgaGgaa         | T  | P38L                               |
| 30-10  | 205     | <b>G→T</b> | catGgac         | NT | E40STOP                            |
| 18-3   | 217     | <b>G→T</b> | atgGaca         | NT | D44Y                               |
| 30-7   | 221     | <b>G→T</b> | acaGgac         | NT | R45M                               |
| *17-2  | 239     | G→C        | ctcGaga         | NT | R51P                               |
| 30-23  | 253     | <b>G→T</b> | aagGaga         | NT | Q56STOP                            |
| 17-5   | 259     | <b>G→T</b> | atgGgag         | NT | G58STOP                            |
| 30-18  | 265     | <b>G→T</b> | gatGgcc         | T  | H60N                               |
| 30-2   | 270     | <b>G→T</b> | aatGtga         | T  | H61Q                               |
| *17-7  | 278     | <b>G→T</b> | aggGcca         | T  | A64D                               |
| 8-5    | 295     | <b>G→T</b> | aaggGggg        | NT | G70W                               |
| 30-40  | 298     | <b>G→T</b> | gggGgct         | NT | G70C                               |
| 30-34  | 316     | <b>G→T</b> | gctGacc         | NT | E77Y                               |
| 30-20  | 382     | A→G        | ataAaat         | T  | P99S                               |
| 17-6   | 449     | A→G        | atgAtct         | NT | D121G                              |
| 30-30  | 480     | <b>G→T</b> | cttGatt         | NT | L131P                              |
| *30-13 | 481     | A→C        | ttgAttg         | NT | I132L                              |
| 30-12  | 506     | <b>G→T</b> | ctgGtaa         | NT | G119V                              |
| 30-28  | 516     | <b>G→T</b> | aatGcaa         | NT | M143I                              |
| 30-8   | 551     | <b>G→T</b> | ttgGggc         | T  | P155H                              |
| *30-13 | 564     | <b>G→T</b> | taaGggt         | NT | K159N                              |
| 30-24  | 568     | <b>G→T</b> | gttGcaa         | NT | A161S                              |
| 30-32  | 625     | <b>G→T</b> | gttGgat         | NT | G180STOP                           |
| 20-2   | 649     | <b>G→T</b> | tttGttg         | NT | V188F                              |
| *17-7  | 652     | <b>G→T</b> | gttGttg         | NT | V189F                              |
| 30-22  | 655     | <b>G→T</b> | gttGgat         | NT | G190STOP                           |
| *18-2  | 666     | A→G        | gtcAagg         | T  | No change                          |
| 21-8   | 686     | G→T        | tcaGgga         | NT | R200M                              |
| 18-9   | 687     | <b>G→T</b> | cagGgat         | NT | R200S                              |
| 18-4   | 713     | <b>G→T</b> | ttaGtga         | NT | S209I                              |
|        |         |            |                 |    |                                    |
| 8-6    | 291     | -1G        | cttGgac         | T  | Frameshift                         |
| 18-5   | 327-328 | A2→A1      | tgtAAtcc        | T  | Frameshift                         |
| 30-3   | 420-424 | G5→G4      | aacGGGG<br>Gaca | NT | Frameshift                         |
| 18-6   | 721-722 | G2→G1      | actGGaaa        | NT | Frameshift                         |
| 21-2   | 727     | -1G        | aaaGcca         | NT | Frameshift                         |
|        |         |            |                 |    |                                    |
| *17-2  | ?       |            |                 |    | Complete deletion of exon 2        |
| *18-2  | ?       |            |                 |    | Complete deletion of exons 2 and 3 |
| 17-4   | ?       |            |                 |    | No mutation found                  |

NT, nontranscribed strand; T, transcribed strand; boldface, G→T transversion, the most frequent type of B[a]P-induced mutation. ?, for large deletions, the position where the large alteration had occurred was not determined exactly.

\*A mutant in which multiple mutations were found.

†The base position is numbered according to the GenBank entry J00423.

‡The strand containing purine at the altered site.

§Uppercase letters indicate the base or sequence altered by the mutation and lowercase letters indicate the surrounding sequence.
